# Supplementary material for: Glycan-based Biological Degraders Targeting the Cytokine Immune Axis
Source: Research Square preprint supplement (doi:10.21203/rs.3.rs-7357847/v1), 2025-10-01
Supplement: Supplementary file 1 [file 1d881d43e8d511131a0d57f7.docx]

**Supplementary Information**

**Supplementary Table 1:** **Thermodynamic parameters of BioDeg variants** were assessed by nanoDSF. Listed is onset temperature and melting points, which are defined as the temperature at which 50% of the protein is unfold. Data shown is the mean of three technical replicates ± SD.

|  | **Onset [°C]** | **Tₘ,1 [°C]** | **Tₘ,2 [°C]** |
| --- | --- | --- | --- |
| **Siltuximab(-TGN)** |  |  |  |
| Siltuximab | 61.20 ± 0.35 | 67.05 ± 0.06 | 79.46 ± 3.20 |
| Siltuximab-TGN 1:1 | 62.20 ± 0.26 | 67.03 ± 0.07 | 80.78 ± 0.24 |
| Siltuximab-TGN 1:5 | 61.70 ± 0.16 | 66.60 ± 0.05 | 80.75 ± 0.11 |
| Siltuximab-TGN 1:10 | n.d. | 65.45 ± 0.10 | 80.10 ± 0.48 |
| Siltuximab-TGN 1:25 | 57.49 ± 0.47 | 63.42 ± 0.13 | 77.96 ± 0.13 |
| **Tocilizumab(-TGN)** |  |  |  |
| Tocilizumab | 63.23 ± 0.08 | 68.60 ± 0.11 | 80.24 ± 0.23 |
| Tocilizumab-TGN 1:1 | 62.27 ± 0.29 | 68.58 ± 0.06 | 80.31 ± 0.15 |
| Tocilizumab-TGN 1:5 | 62.49 ± 0.61 | 68.36 ± 0.11 | 80.01 ± 0.11 |
| Tocilizumab-TGN 1:10 | 61.61 ± 0.31 | 68.05 ± 0.06 | 79.53 ± 0.07 |
| Tocilizumab-TGN 1:25 | 59.84 ± 0.49 | 67.00 ± 0.03 | 78.23 ± 0.16 |
| **VHH_IL6(-TGN)** |  |  |  |
| VHH_IL6 | 50.83 ± 0.58 | 58.87 ± 0.24 |  |
| VHH_IL6-TGN 1:1 | 50.51 ± 1.01 | 58.62 ± 0.21 |  |
| VHH_IL6-TGN 1:5 | 48.65 ± 0.48 | 58.03 ± 0.27 |  |
| VHH_IL6-TGN 1:10 | 45.27 ± 2.10 | 56.85 ± 0.39 |  |
| **sIL6R(-TGN)** |  |  |  |
| sIL6R | 44.05 ± 0.79 | 50.95 ± 0.19 |  |
| sIL6R-TGN 1:1 | 44.25 ± 0.90 | 51.11 ± 0.14 |  |
| sIL6R-TGN 1:5 | 44.25 ± 0.26 | 51.81 ± 0.20 |  |
| sIL6R-TGN 1:10 | 43.90 ± 0.81 | 51.97 ± 0.15 |  |
| sIL6R-TGN 1:25 | 42.67 ± 2.27 | 51.27 ± 0.15 |  |

**Supplementary Table 2:** **Kinetic parameters of BioDeg variants** determined by SPR for binding to IL-6 and IL-6R. The table provides an overview of association (kon) and dissociation (koff) rate constants as well as binding affinities (KD). Additionally, quality metrics for the 1:1 binding model are listed, including transport correction (tc) and Chi² (goodness of fit between model and sensorgram data. IL-6 and IL-6R were immobilized on a CM5 sensor chip via amine coupling. Analytes were injected using a multi-cycle kinetic format. Measurements were performed on a Biacore T200 using the corresponding evaluation software.

|  | kₒₙ [1/Ms] | koff [1/s] | KD | tc | Chi² [RU²] |
| --- | --- | --- | --- | --- | --- |
| **Siltuximab(-TGN)** |  |  |  |  |  |
| Siltuximab | 4.45 x 10⁵ | < 10⁻⁵ | < 22 pM | 7.65 x 10¹⁴ | 0.58 |
| Siltuximab-TGN 1:1 | 5.22 x 10⁵ | < 10⁻⁵ | < 19 pM | 1.52 x 10¹⁰ | 1.75 |
| Siltuximab-TGN 1:5 | 3.75 x 10⁵ | < 10⁻⁵ | < 27 pM | 8.61 x 10¹⁰ | 0.33 |
| Siltuximab-TGN 1:10 | 2.78 x 10⁵ | < 10⁻⁵ | < 36 pM | 7.76 x 10⁹ | 0.05 |
| Siltuximab-TGN 1:25 | 2.21 x 10⁵ | < 10⁻⁵ | < 45 pM | 1.65 x 10¹⁰ | 0.01 |
| **Tocilizumab(-TGN)** |  |  |  |  |  |
| Tocilizumab | 2.65 x 10⁵ | 1.80 x 10⁻⁵ | 68 pM | 3.31 x 10¹⁴ | 0.05 |
| Tocilizumab-TGN 1:1 | 2.63 x 10⁵ | < 10⁻⁵ | < 38 pM | 5.33 x 10¹² | 0.13 |
| Tocilizumab-TGN 1:5 | 2.52 x 10⁵ | 2.36 x 10⁻⁵ | 93 pM | 2.32 x 10¹⁴ | 0.07 |
| Tocilizumab-TGN 1:10 | 2.35 x 10⁵ | 4.98 x 10⁻⁵ | 212 pM | 2.48 x 10¹⁴ | 0.04 |
| Tocilizumab-TGN 1:25 | 1.91 x 10⁵ | 6.26 x 10⁻⁵ | 328 pM | 1.39 x 10¹⁴ | 0.05 |
| **VHH_IL6(-TGN)** |  |  |  |  |  |
| VHH_IL6 | 5.69 x 10⁵ | 6.28 x 10⁻⁵ | 110 pM | 2.37 x 10¹⁴ | 0.07 |
| VHH_IL6-TGN 1:1 | 6.11 x 10⁵ | 7.42 x 10⁻⁵ | 121 pM | 3.65 x 10¹⁴ | 0.08 |
| VHH_IL6-TGN 1:5 | 2.06 x 10⁵ | 4.17 x 10⁻⁵ | 203 pM | 3.08 x 10¹⁵ | 0.004 |
| VHH_IL6-TGN 1:10 | 1.54 x 10⁵ | 4.08 x 10⁻⁵ | 265 pM | 7.68 x 107 | 0.006 |
| **sIL6R(-TGN)** |  |  |  |  |  |
| sIL6R | 2.68 x 10⁵ | 0.035 | 131 nM | 1.56 x 10¹² | 0.07 |
| sIL6R-TGN 1:1 | 2.29 x 10⁵ | 0.038 | 166 nM | 4.77 x 10¹² | 0.06 |
| sIL6R-TGN 1:5 | 1.65 x 10⁵ | 0.038 | 230 nM | 5.92 x 10¹¹ | 0.03 |
| sIL6R-TGN 1:10 | 7.57 x 10⁵ | 0.032 | 428 nM | 7.35 x 10¹¹ | 0.06 |
| sIL6R-TGN 1:25 | no binding |  |  |  |  |

**
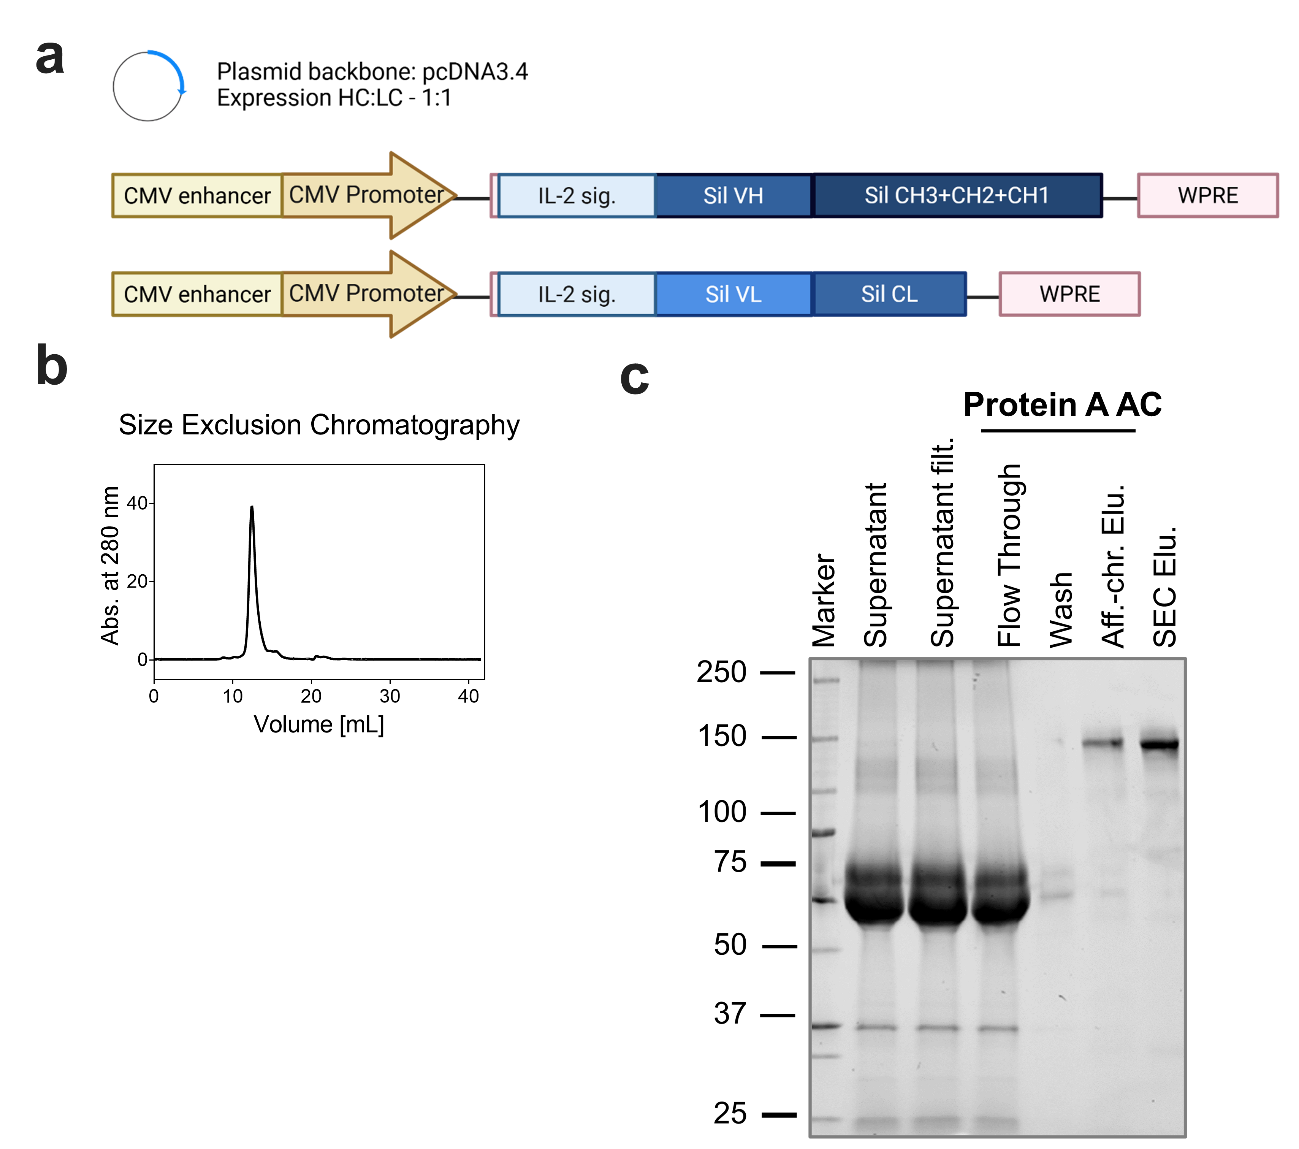
**

**Supplementary Figure 1:** **Siltuximab Design & Production** **(a)** Plasmid Design for Siltuximab heavy and light chain1. Inserts displayed here were cloned into a pcDNA3.4 vector for expression in HEK293T cells. **(b)** Purification via Protein A affinity chromatography and SEC with **(c)** SDS-PAGE analysis of each purification step.

**
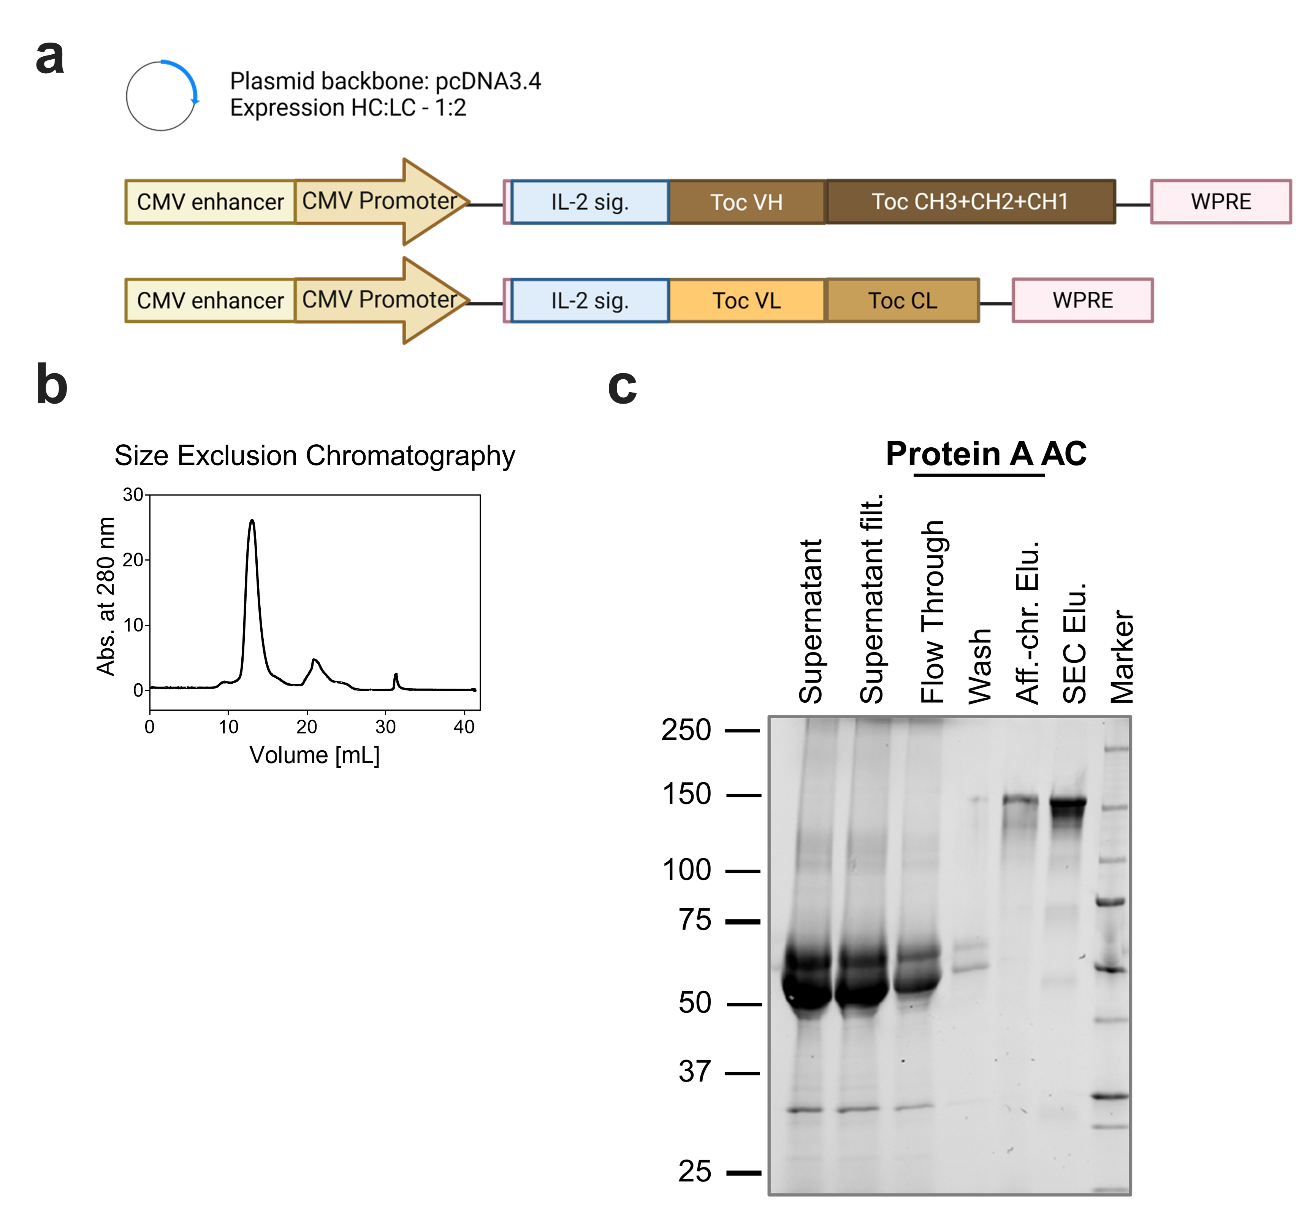
Supplementary Figure 2: Tocilizumab Design & Production (a)** Plasmid Design for Tocilizumab heavy and light chain1. Inserts displayed here were cloned into a pcDNA3.4 vector for expression in HEK293T cells*.* **(b)** Purification via Protein A affinity chromatography and SEC with **(c)** SDS-PAGE analysis of each purification step.

**
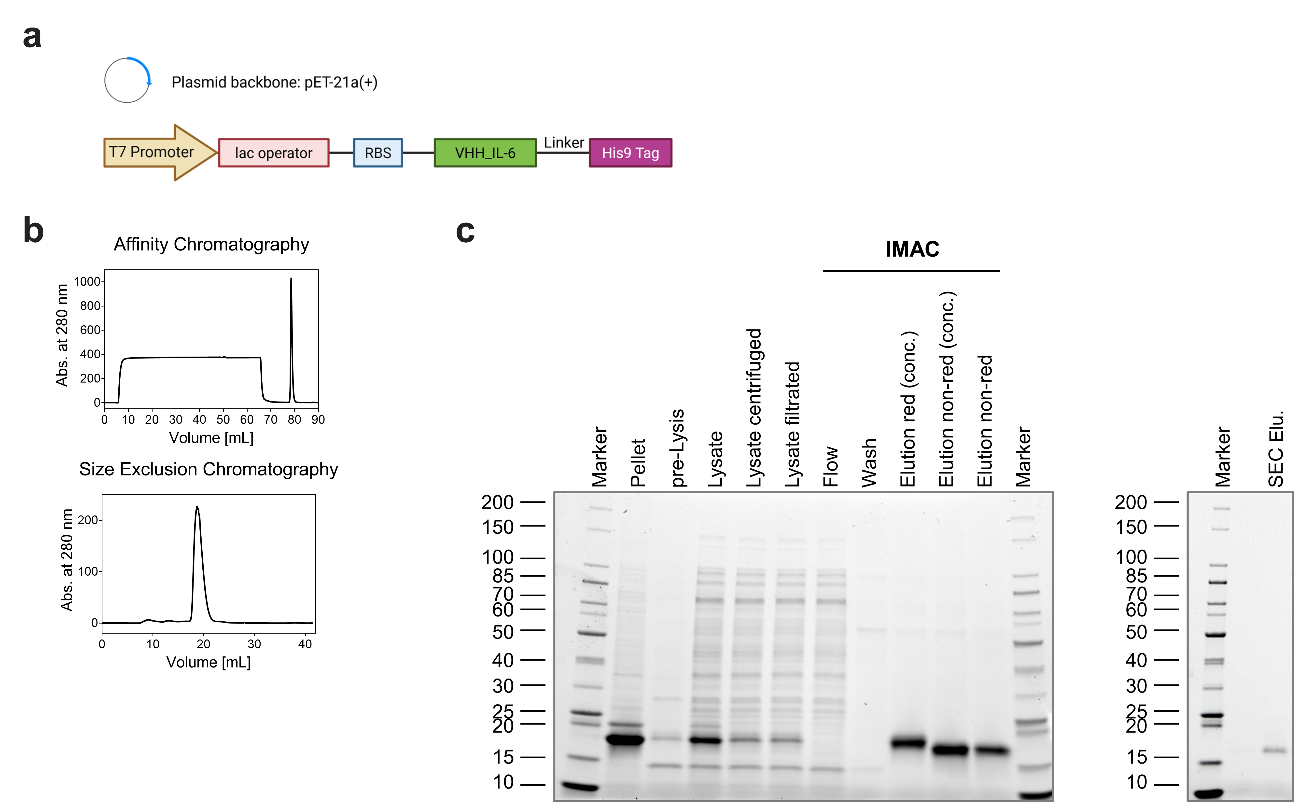
Supplementary Figure 3: VHH against IL-6 Design & Production (a)** Plasmid Design for VHH_IL-6 with a His9 Tag1. Inserts displayed here were cloned into a pET21a(+) vector for expression in SHuffle® T7 (Express) *E. coli.* **(b)** Purification via Nickel Immobilized Metal Affinity Chromatography (Ni-IMAC) and SEC with **(c)** SDS-PAGE analysis of each purification step.

**
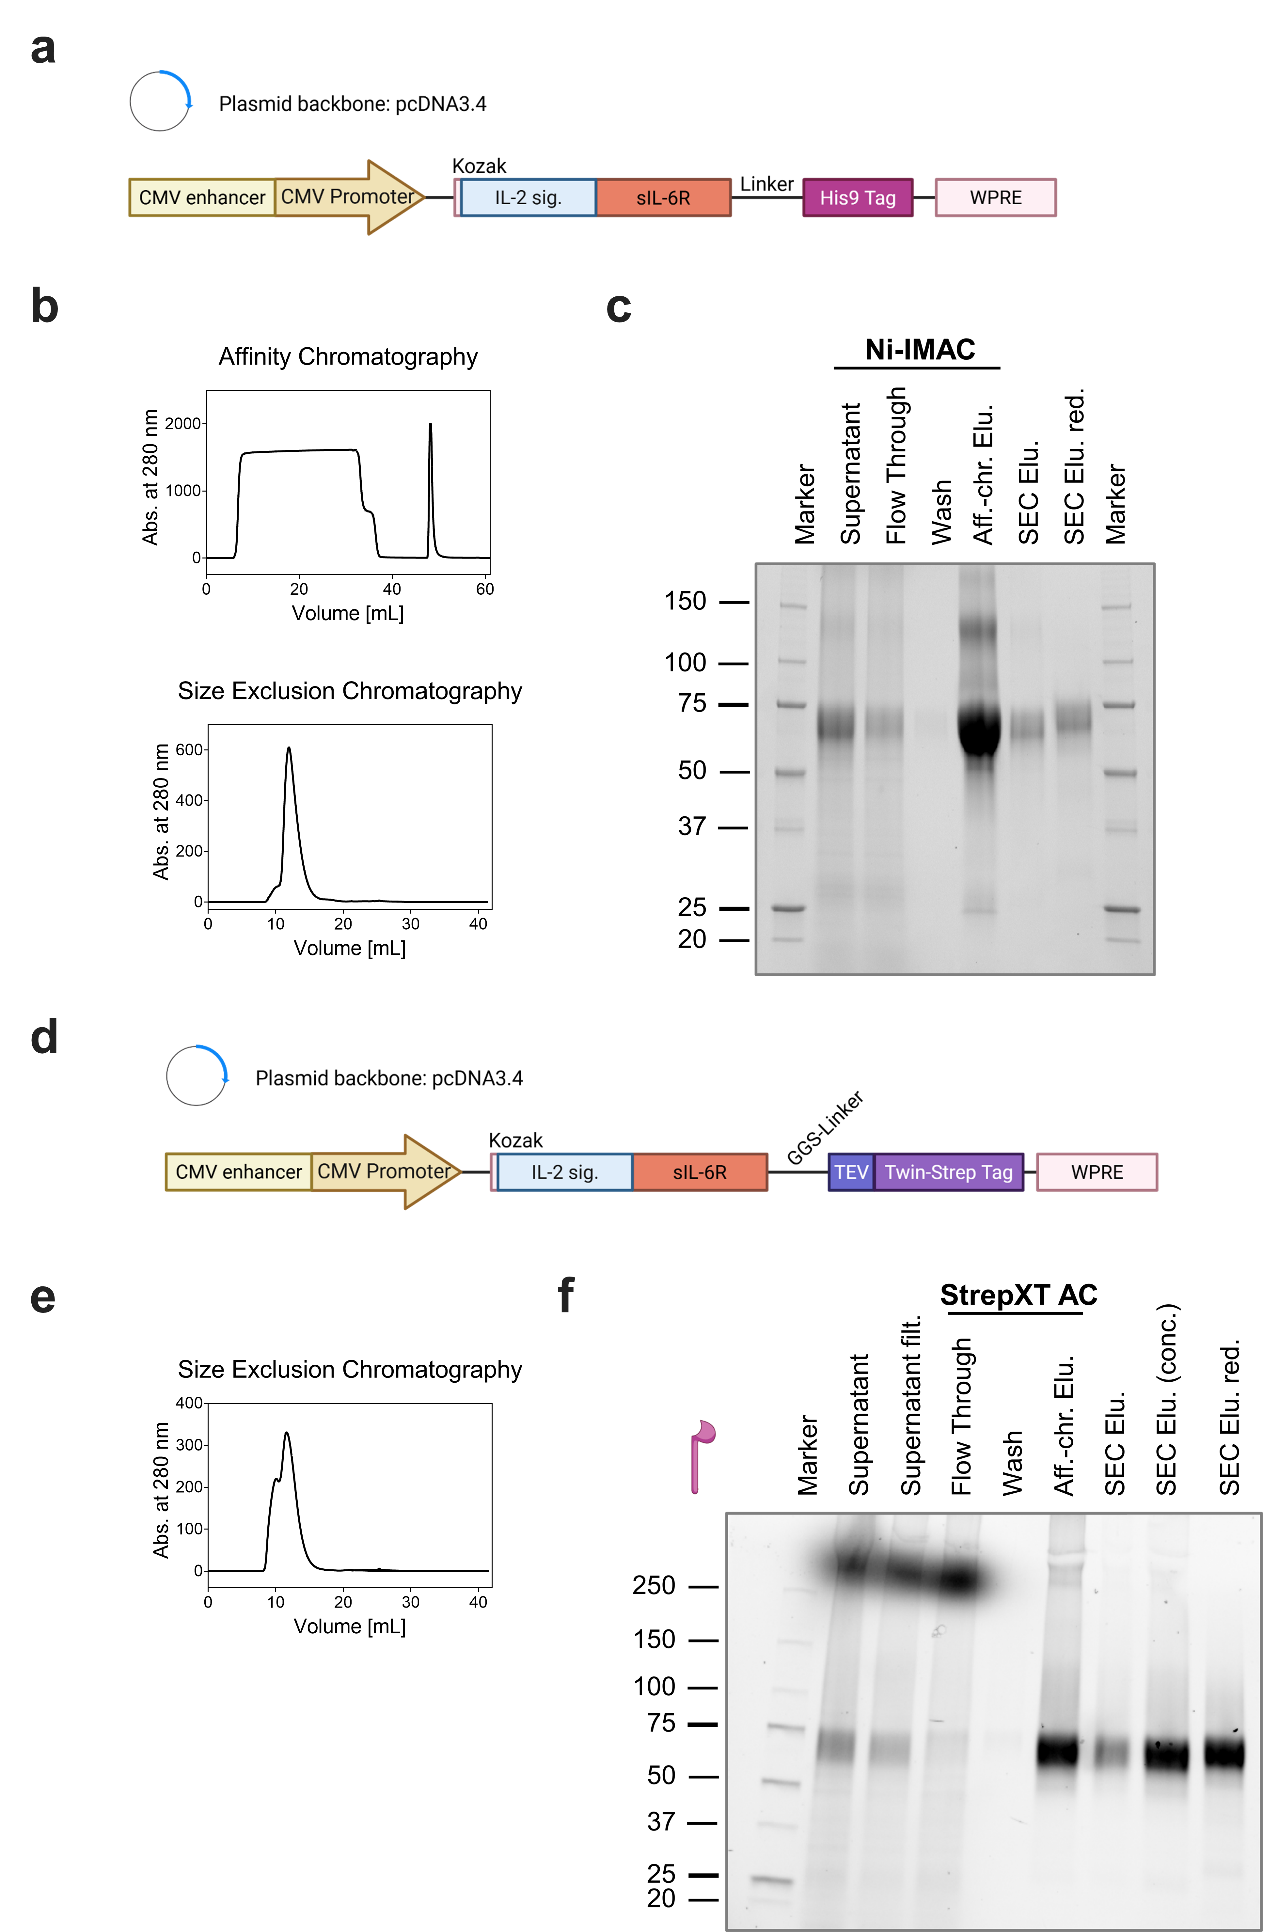
Supplementary Figure 4: sIL-6R Design & Production (a)** Plasmid Design for sIL-6R with a His9-Tag1. Inserts displayed here were cloned into a pcDNA3.4 vector for expression in EXPI293F cells*.* **(b)** Purification via Ni-IMAC and SEC with **(c)** SDS-PAGE analysis of each purification step. **(d)** Plasmid Design for sIL-6R with a Twin-Strep-Tag and TEV cleavage site1. Inserts displayed here were cloned into a pcDNA3.4 vector for expression in EXPI293F cells*.* **(b)** Purification via StrepTactin XT based affinity chromatography and SEC with **(c)** SDS-PAGE analysis of each purification step.

**
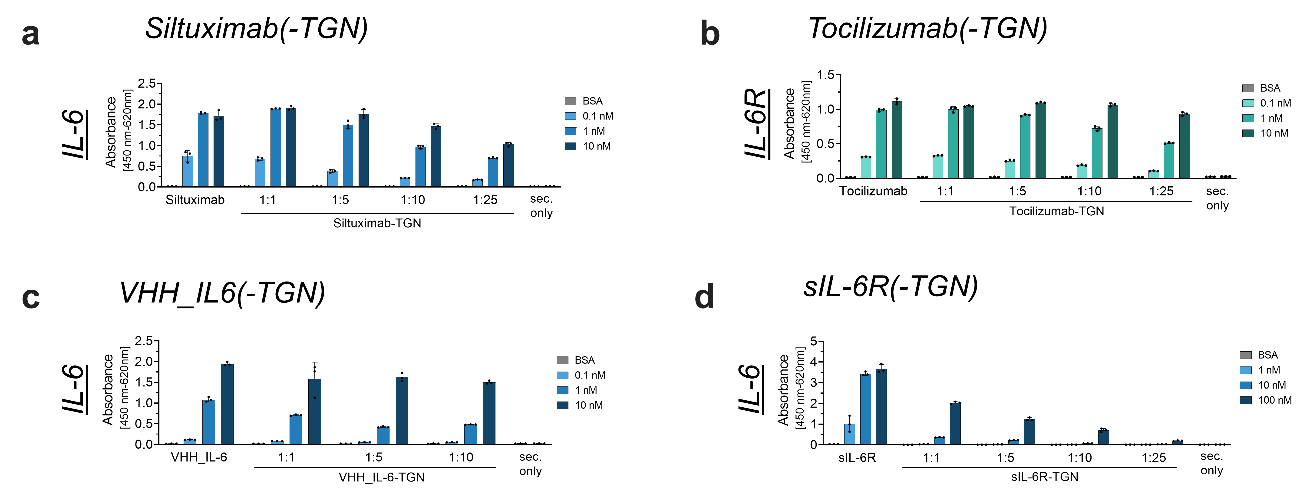
Supplementary Figure 5: Binding of BioDeg constructs to IL-6/ IL-6R assessed by indirect ELISA.** Binding analysis of four BioDeg constructs: **(a)** Siltuximab-TGN, **(b)** Tocilizumab-TGN, **(c)** VHH_IL-6-TGN and **(d)** sIL-6R-TGN. Detection was performed using anti-His-HRP for VHH_IL-6 and sIL-6R constructs, and anti-human-HRP for antibody-based constructs (Siltuximab, Tocilizumab), with absorbance measured at 450 nm (reference: 620 nm) after TMB development. A sec. only control was included to assess background signal from anti-human/ anti-His-HRP binding in the absence of sample incubation. Assays were conducted in PBS. Data are shown as mean ± SD of technical triplicates.

**
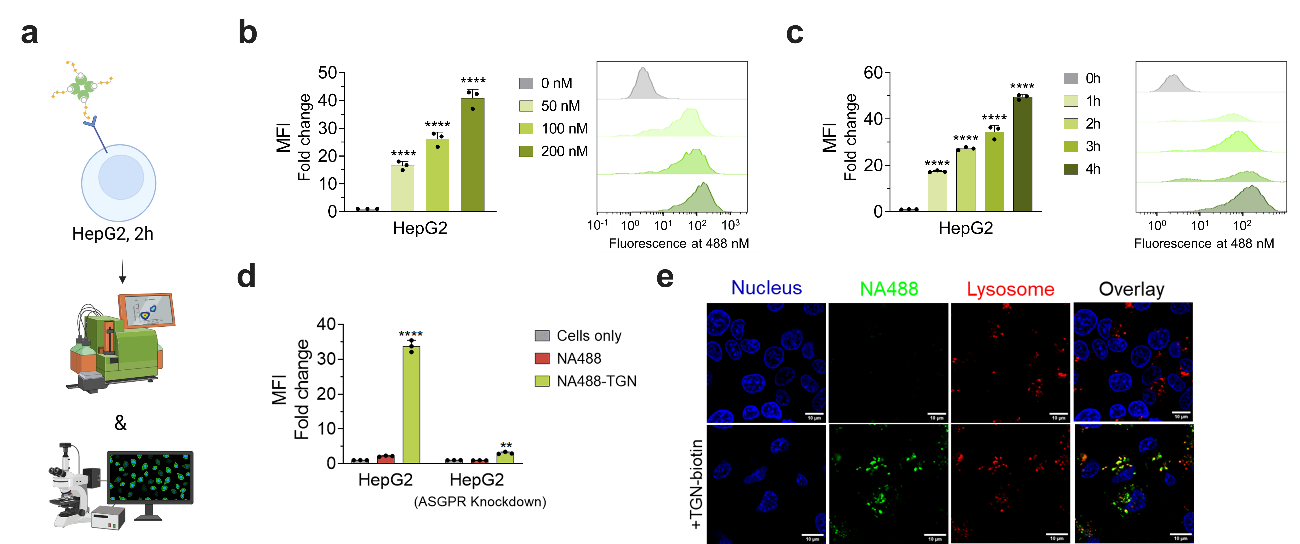
Supplementary Figure 6: Establishment of Tri-GalNAc (TGN) uptake in HepG2 cells. (a)** Schematic representation of uptake assay using fluorescent Neutravidin (Oregon Green 488, NA488) in complex with TGN (NA488:TGN, 1:3)2. Flow cytometry quantification of TGN uptake in HepG2 cells in a **(b)** concentration-dependent and **(c)** time-dependent manner. **(d)** Uptake of TGN in ASGPR-Knockdown HepG2 cells, including NA488 alone as control (100 nM, 2 h incubation). Data are mean ± SD of three biological replicates. **(e)** Confocal microscopy showing internalized NA488 (green) +/- TGN, lysosomes (red; LysoTracker™), and nuclei (blue; NucBlue™). Assay was performed at 100 nM NA488 (300 nM TGN) with 2 h incubation time. Scale bars = 10 µm. **Statistical analysis:** One-Way ANOVA (b,c)/ Two-Way ANOVA (d) analysis with Dunnet’s multiple comparisons test was used. < 0.1 (*), < 0.01(**), < 0.001 (***) and < 0.0001 (****) indicate significant differences between untreated and treated cells. *MFI* = mean fluorescence intensity. Fold change was calculated as normalization to untreated cells.

**
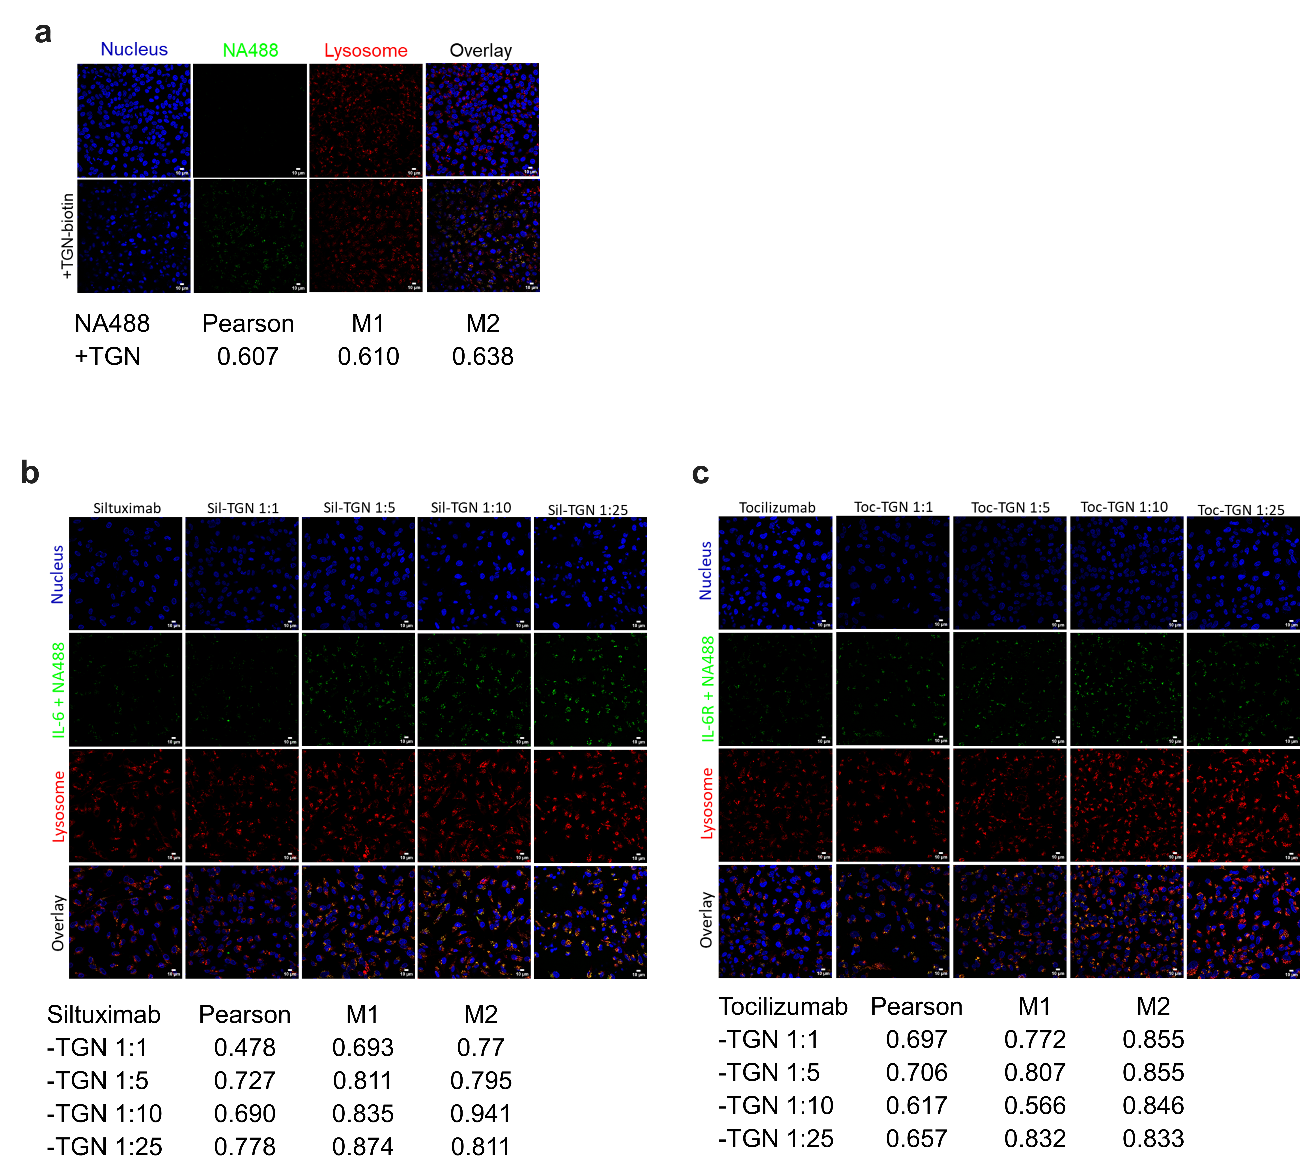
**

**
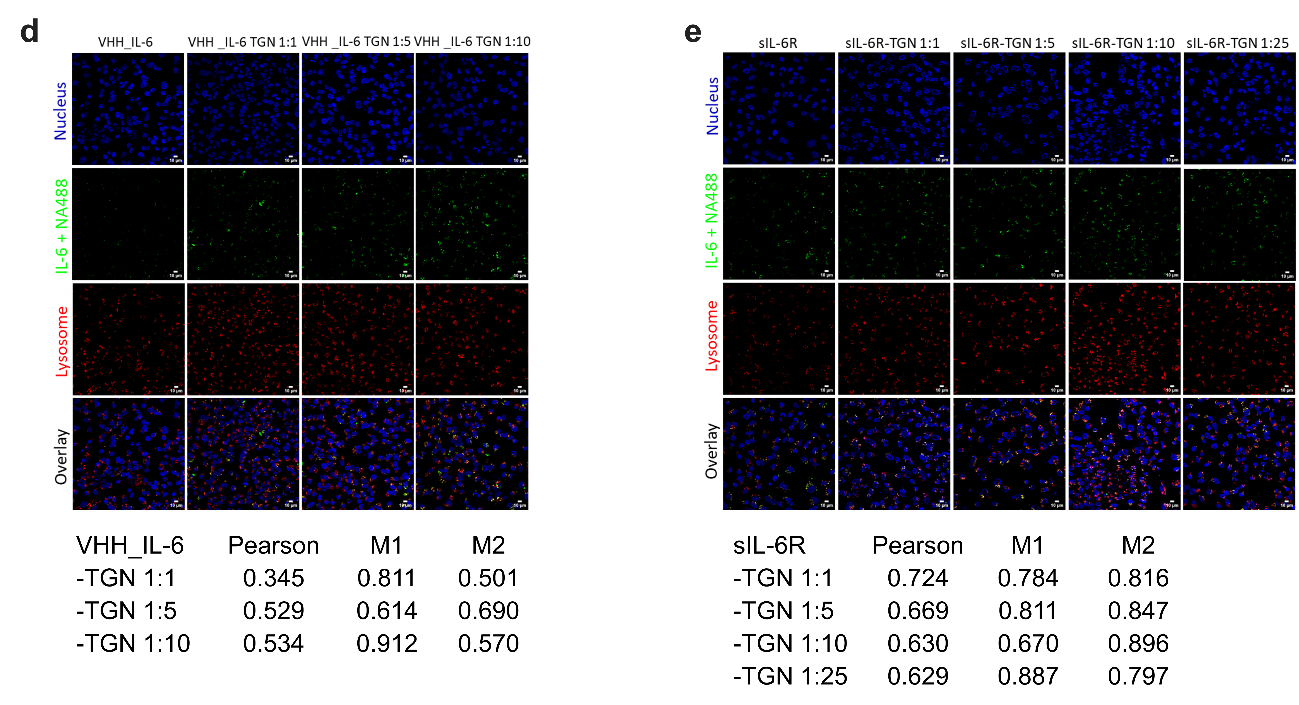
Supplementary Figure 7: Live-cell confocal microscopy** showing intracellular localization of IL-6 (green), lysosomes (red; LysoTracker™), and nuclei (blue; NucBlue™). Images show > 10 cells each. Pearson correlation coefficient and Manders‘ coefficients were calculated using the JaCoP Plugin in ImageJ. Thresholds were set manually. M1 = ch01 (red) overlapping ch02 (green); M2 = ch02 (green) overlapping ch01 (red). Scale bars = 10 µm. **(a)** NA488 +/- TGN-biotin; **(b)** Siltuximab (-TGN) + IL-6; **(c)** Tocilizumab(-TGN) + IL-6R; **(d)** VHH_IL-6(-TGN) + IL-6; **(e)** sIL-6R(-TGN) + IL-6.

**
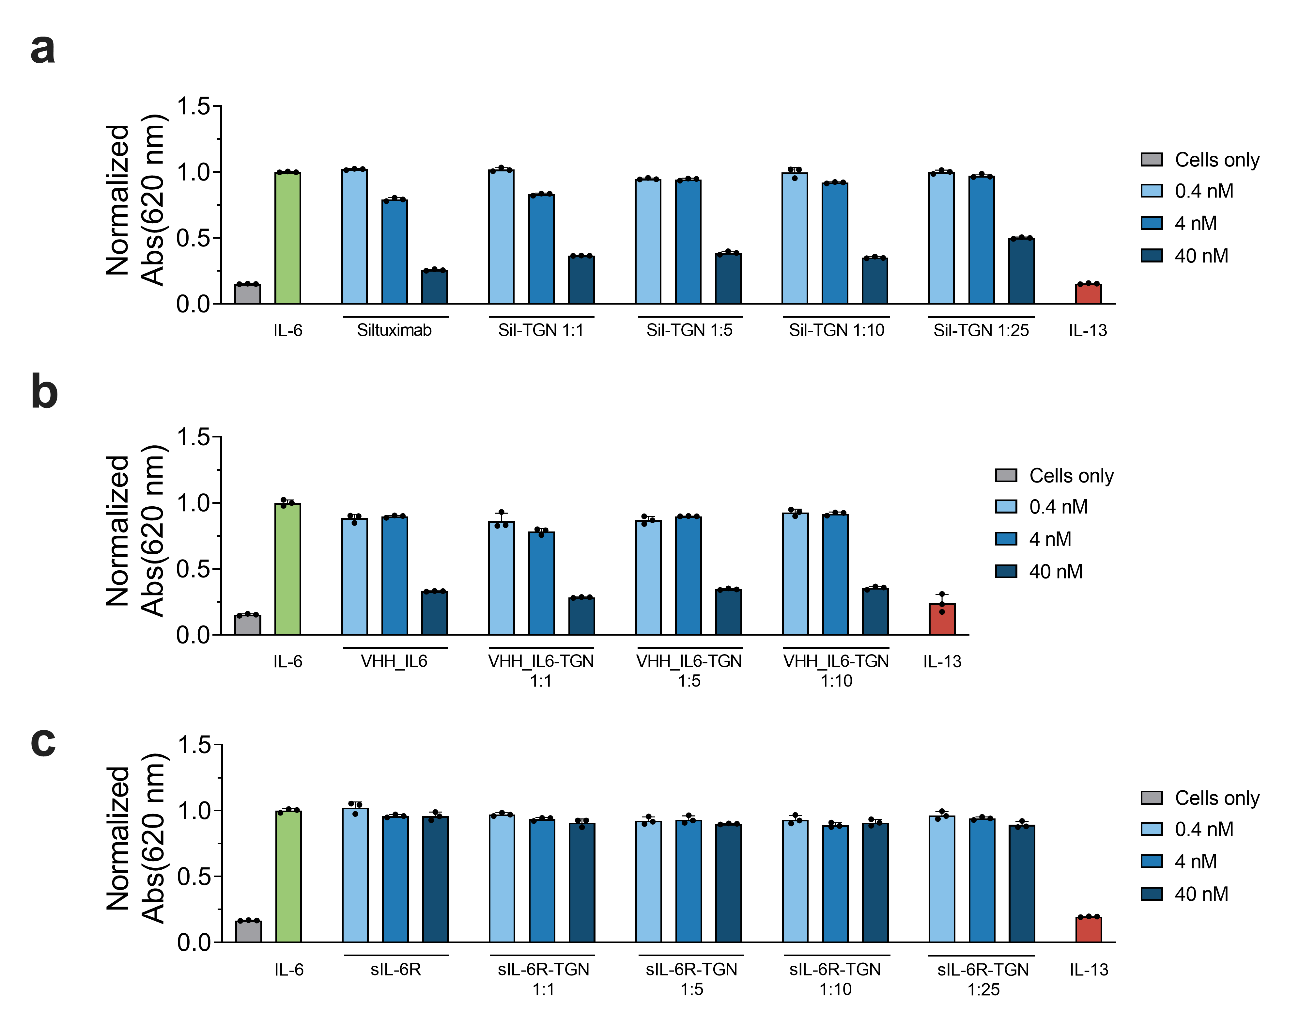
Supplementary Figure 8: IL-6 signaling in HEK-Blue™ IL-6 reporter cells.** HEK-Blue™ IL-6 cells were stimulated with IL-6 (100 ng/mL) in complex with **(a)** Siltuximab(-TGN), **(b)** VHH_IL-6(-TGN), or **(c)** sIL-6R(-TGN) at the indicated concentrations (0.4 nM, 4 nM, 40 nM). IL-13 (100 ng/mL) was included as a negative control. SEAP activity was measured after 20 h of incubation using QUANTI-Blue™ reagent. Absorbance was recorded at 620 nm. Data represent mean ± SD of biological triplicates.

**
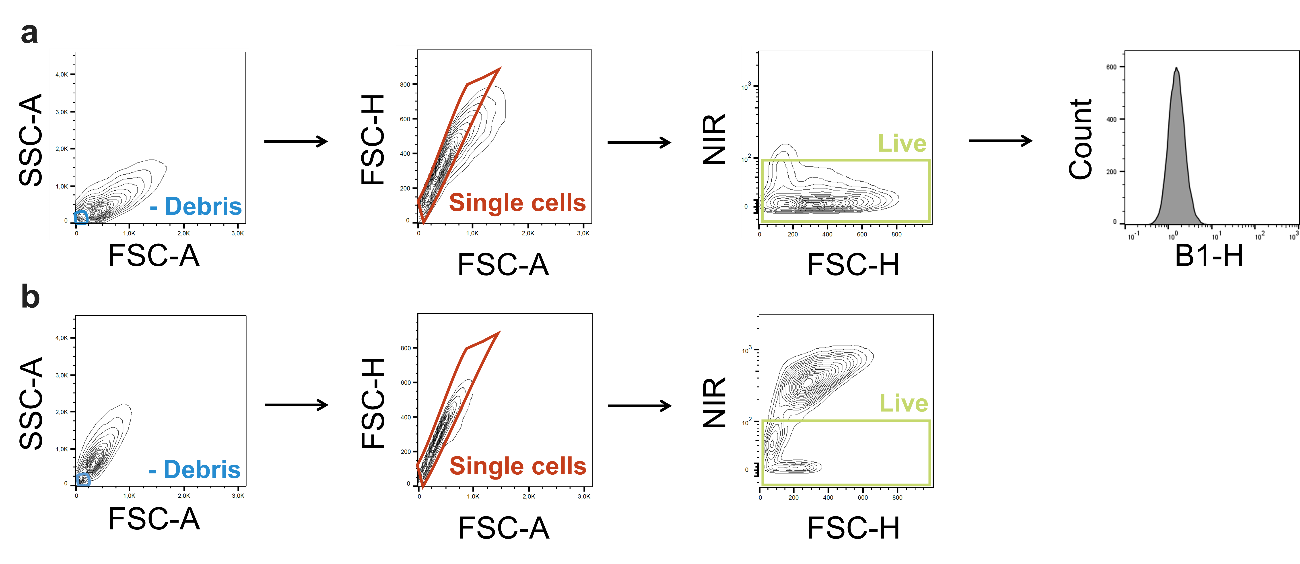
Supplementary Figure 9: Gating strategy for flow cytometry analysis in HepG2 cells. (a)** Gating of viable HepG2 cells; **(b)** gating of dead cells based on near-infrared (NIR) viability dye exclusion.
Initial gating was performed using forward scatter (FSC) and side scatter (SSC) to exclude debris and identify the main cell population. Singlet discrimination was applied via FSC-A vs. FSC-H gating to eliminate doublets and aggregates. Viability gating based on NIR staining allowed exclusion of dead cells. A histogram illustrates the fluorescence intensity (e.g., NA488-IL-6 signal) in the gated, viable single-cell population. Fluorescence thresholds were defined using untreated and unstained controls. All gating steps were applied consistently across biological replicates.

1. Created in BioRender. *Safarian, S. (2025)* https://BioRender.com/ qlelnew.

2. Created in BioRender. *Safarian, S. (2025)* https://BioRender.com/ bfvbs3q.
